# Supplementary material for: Efficacy of extracorporeal shock wave therapy for knee tendinopathies and other soft tissue disorders: a meta-analysis of randomized controlled trials
Source: PubMed Central journal article supplement (PMC6090995; doi:10.1186/s12891-018-2204-6), 2018-08-02
Supplement: 12891_2018_2204_MOESM2_ESM.pdf [file 12891_2018_2204_MOESM2_ESM.pdf]

**Table S2** Summary of funding information and conflict of interest disclosure for each included trial

| <b>Study author (year) [reference]</b> | <b>Source name</b>                                                                                    | <b>Grant/Project Number</b>           | <b>Conflict of interest</b> |
|----------------------------------------|-------------------------------------------------------------------------------------------------------|---------------------------------------|-----------------------------|
| Chen (2014) [51]                       | National Science Council of Taiwan                                                                    | NSC: 99-2314-B-037-011-MY3            | None declared               |
| Geng (2017) [90]                       | Science and Technology Bureau (Dazhou City, Sichuan Province, China) <sup>§</sup>                     | 2015JY0170                            | No information              |
| Guan (2015) [80]                       | No information                                                                                        | No information                        | No information              |
| Huang (2017) [88]                      | Health and Family Planning Commission Scientific Research (Gvangjsih Bouxcuengh Swcigih) <sup>§</sup> | Z2014353                              | No information              |
| Jiang (2016) [81]                      | No information                                                                                        | No information                        | No information              |
| Khosrawi (2017) [48]                   | Isfahan University of Medical Sciences                                                                | 393191                                | None declared               |
| Liu (2016) [82]                        | Scientific and Technical Research Fund (Jiangxi Province Office of Education) <sup>§</sup>            | GJJ 14679                             | No information              |
| Taunton (2003) [83]                    | The Nike Research Foundation;<br>BC Sports Medicine Research Foundation;<br>Siemens AG; Sonorex       | No information                        | Declared                    |
| Thijs (2017) [84]                      | No information                                                                                        | No information                        | None declared               |
| Vetrano (2013) [85]                    | No information                                                                                        | No information                        | None declared               |
| Wang (2014) [86]                       | National Science Council;<br>Chang Gung Research Fund                                                 | NSC96-2314-B-182A-143;<br>CMRPG8B1291 | None declared               |

*(Continued)*

**Table S2** Continued

| <b>Study author (year) [reference]</b> | <b>Source name</b>                                                                             | <b>Grant/Project Number</b> | <b>Conflict of interest</b> |
|----------------------------------------|------------------------------------------------------------------------------------------------|-----------------------------|-----------------------------|
| Weckström (2016) [52]                  | No information                                                                                 | No information              | No information              |
| Wu (2009) [91]                         | No information                                                                                 | No information              | No information              |
| Wu (2016) [89]                         | No information                                                                                 | No information              | No information              |
| Yang (2007) [16]                       | No information                                                                                 | No information              | No information              |
| Zhang (2016) [92]                      | Health and Family Planning Major Research Program (Ningxia Hui Autonomous Region) <sup>§</sup> | 2014-NW-036                 | No information              |
| Zhang (2017) [17]                      | No information                                                                                 | No information              | No information              |
| Zhou (2015) [53]                       | No information                                                                                 | No information              | No information              |
| Zwerver (2011) [87]                    | Netherlands Organisation for Health Research and Development (ZonMW)                           | 750.20.010.                 | Declared                    |

<sup>§</sup>The name of the funding source was translated to English by using translation software (Ginger Software, Inc.).
