# Supplementary material for: Efficacy of extracorporeal shock wave therapy for knee tendinopathies and other soft tissue disorders: a meta-analysis of randomized controlled trials
Source: PubMed Central journal article supplement (PMC6090995; doi:10.1186/s12891-018-2204-6), 2018-08-02
Supplement: 12891_2018_2204_MOESM6_ESM.pdf [file 12891_2018_2204_MOESM6_ESM.pdf]

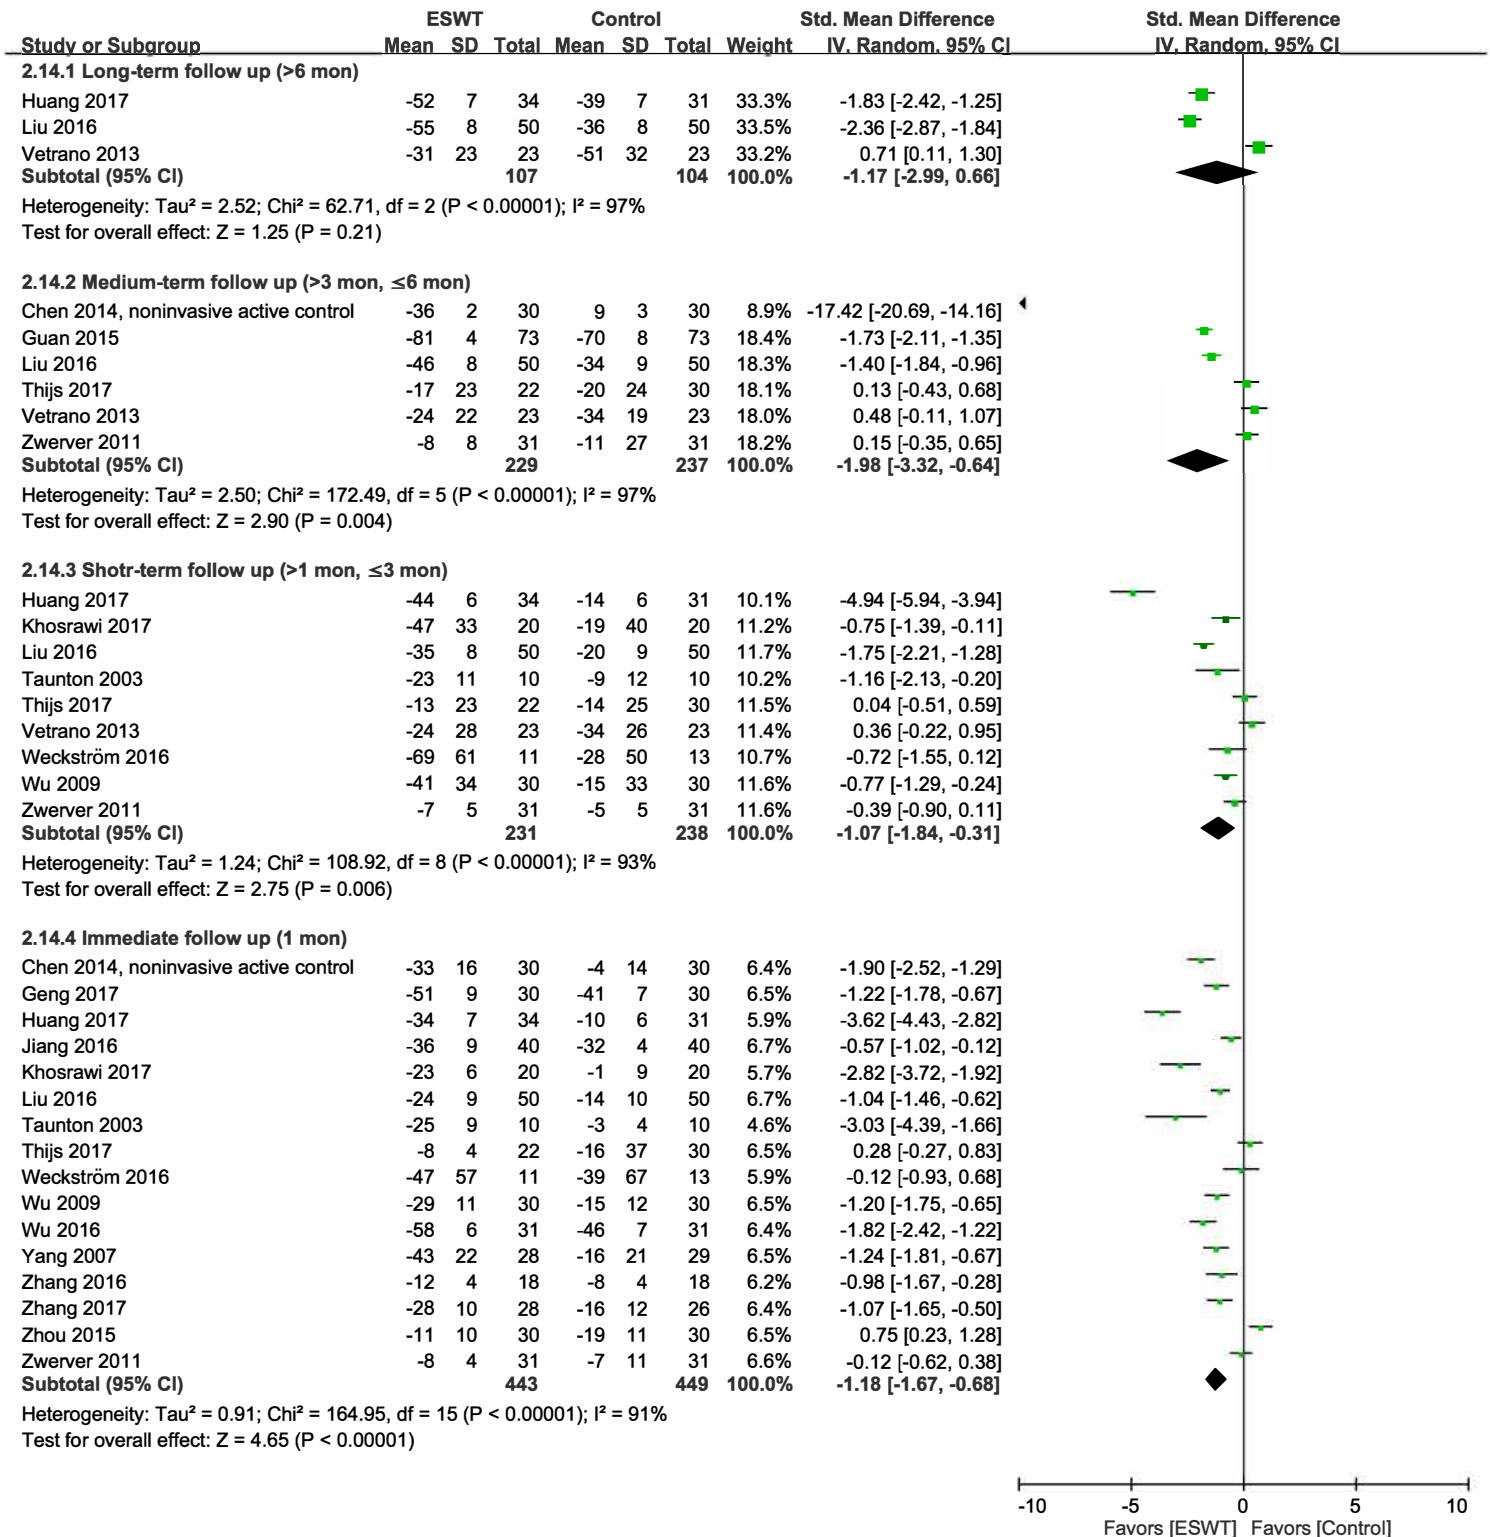

Figure S4. Forest plot of effects of extracorporeal shock wave therapy on pain reduction at each follow up time point. The horizontal line links the lower and upper limits of the 95% CI of this effect. The combined effects are plotted using black diamonds. ESWT = extracorporeal shock wave therapy; 95% CI = 95% confidence interval; Random = random-effects model; Std. = standard.
