# Supplementary material for: Efficacy of extracorporeal shock wave therapy for knee tendinopathies and other soft tissue disorders: a meta-analysis of randomized controlled trials
Source: PubMed Central journal article supplement (PMC6090995; doi:10.1186/s12891-018-2204-6), 2018-08-02
Supplement: 12891_2018_2204_MOESM7_ESM.pdf [file 12891_2018_2204_MOESM7_ESM.pdf]

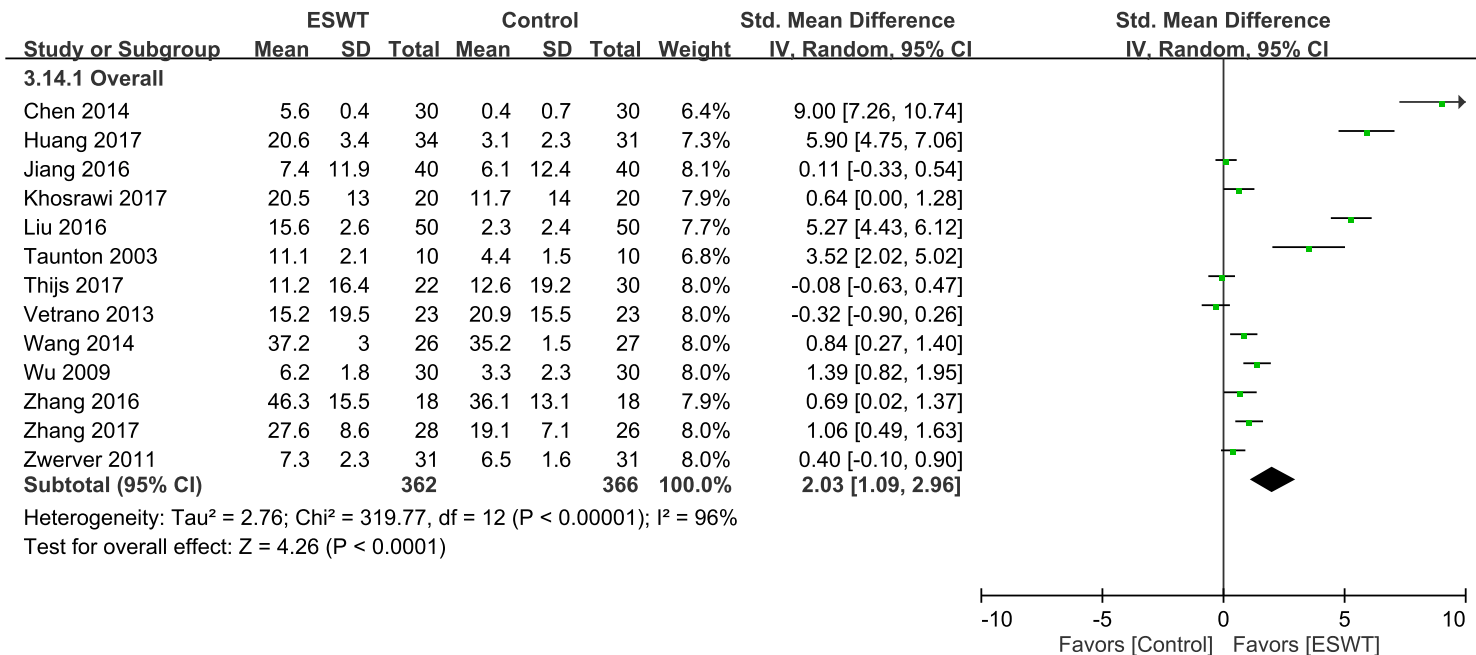

**Figure S5. Forest plot of effects of extracorporeal shock wave therapy on patient-reported function outcome at an overall duration.** The horizontal line links the lower and upper limits of the 95% CI of this effect. The combined effects are plotted using black diamonds. ESWT = extracorporeal shock wave therapy; 95% CI = 95% confidence interval; Random = random-effects model; Std. = standard.
